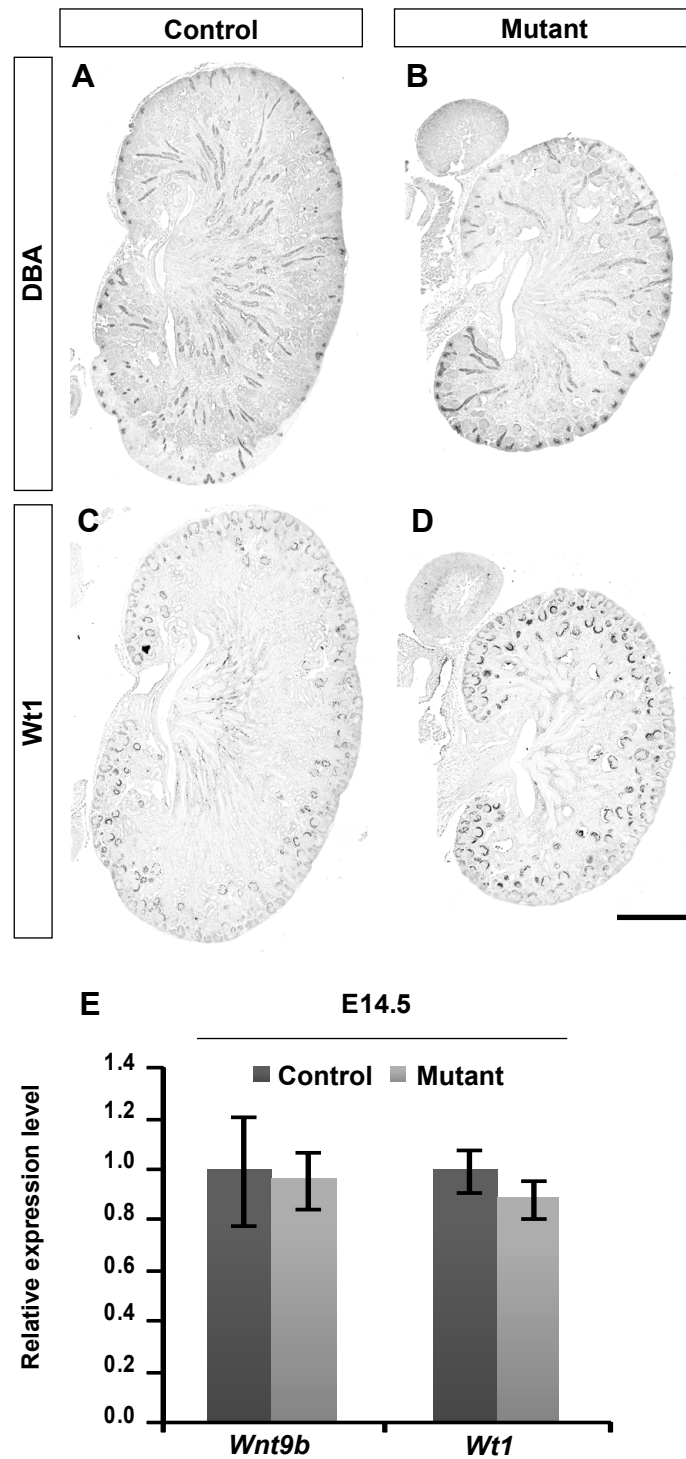

**Fig. S1. The absence of HNF1 $\beta$  in metanephric mesenchyme does not affect UB branching and podocyte differentiation.** (A-C) Kidney sections of newborns from control and mutant showed a similar staining for collecting ducts with Dolicho biflorus agglutinin (DBA) (A,B) and for Wt1 (C,D). (E) qRT-PCR analysis of specific markers of collecting ducts (*Wnt9b*) and podocytes (*Wt1*) did not show any difference between control and mutant kidneys at E14.5. Scale bar: 500  $\mu$ m.

**A**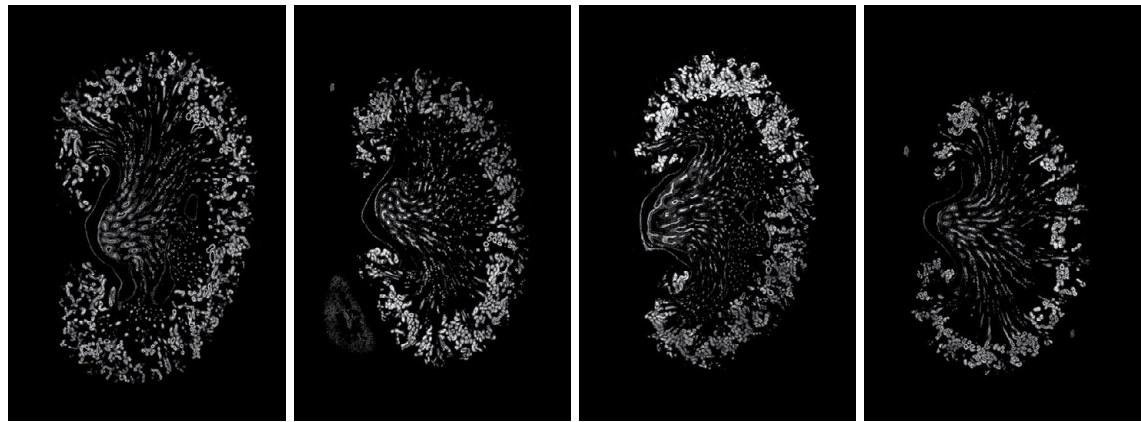

Wild-type

Notch2<sup>+/-</sup>Hnf1b<sup>+/-</sup>Hnf1b<sup>+/-</sup>;  
Notch2<sup>+/-</sup>**B**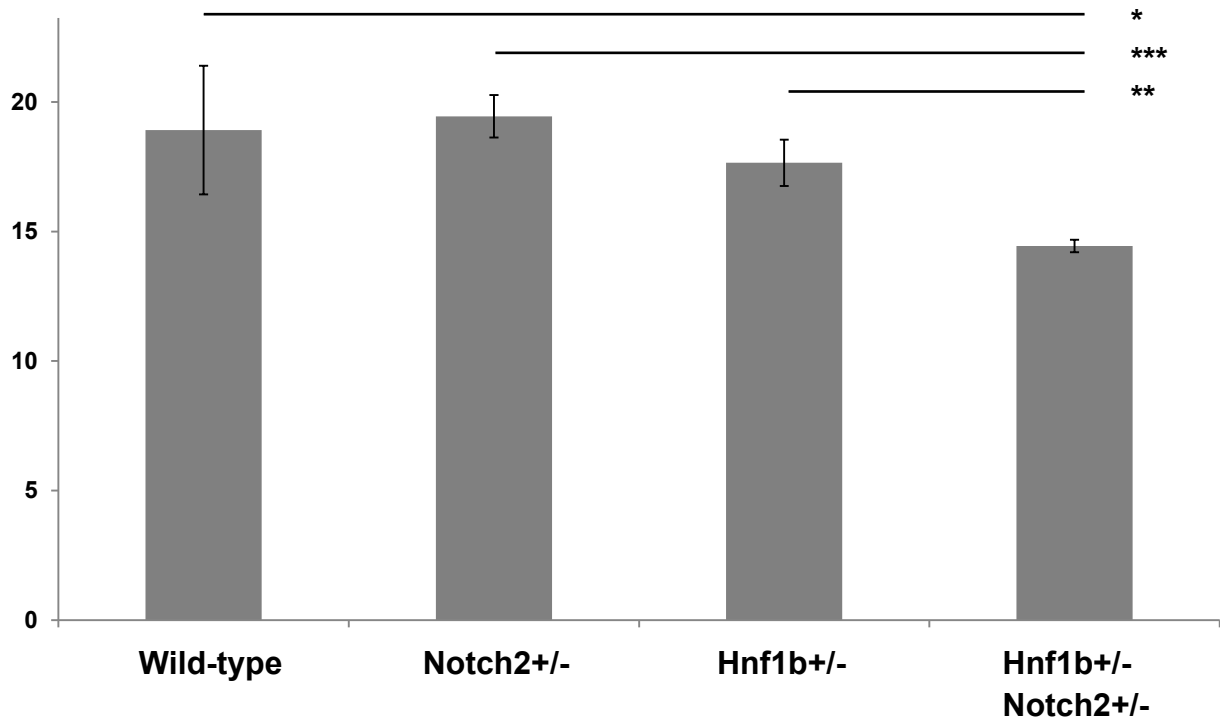

**Fig. S2. Genetic interaction between *Hnf1b* and *Notch2* in proximal tubule expansion.** (A) Immunofluorescence detection of *Lotus tetragonolobus* lectin (LTL; proximal tubules) showing the slight decrease in expansion of proximal tubules in double-heterozygous pups (*Notch2*<sup>+/-</sup>; *Hnf1b*<sup>+/-</sup>). (B) Quantification of the relative (percentage) surface of proximal tubules per kidney section. *n*=3, 5, 4 and 6 for wild type, *Notch2*<sup>+/-</sup>, *Hnf1b*<sup>+/-</sup> and *Hnf1b*<sup>+/-</sup>; *Notch2*<sup>+/-</sup>, respectively. Student's *t*-test: \**P*=0.015, \*\**P*=0.0015, \*\*\**P*<0.001.

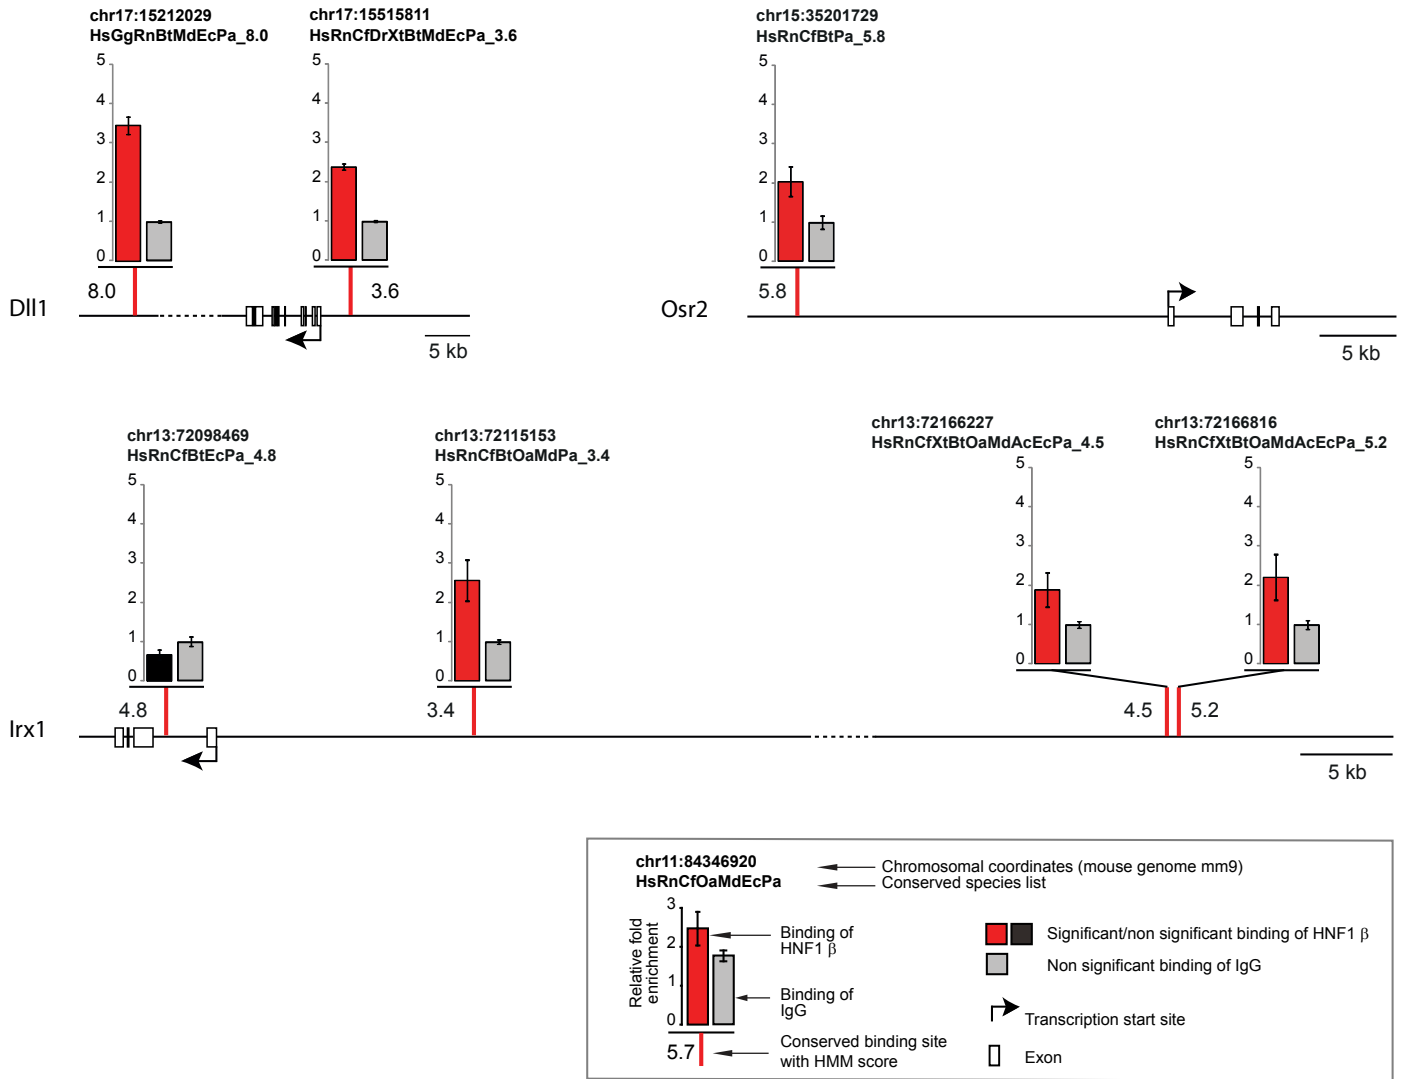

**Fig. S3. In vivo binding of HNF1 $\beta$  to its chromatin target sites in genes involved in tubular differentiation.** Predicted *in silico* HNF1 binding sites (vertical bars) in *Dll1*, *Osr2* and *Irx1* genes were tested in ChIP experiments for *in vivo* HNF1 $\beta$  binding. The relative enrichment for each DNA fragment upon immunoprecipitation of HNF1 $\beta$  is illustrated in histograms. Colored bars represent HNF1 binding sites with enrichments significantly higher than background (gray bars). PCR experiments were performed in triplicate and the standard errors of these quantifications are shown as error bars. Species list of conserved sites: Ac, *Anolis carolinensis*; Bt, *Bos taurus*; Cf, *Canis familiaris*; Dr, *Danio rerio*; Ec, *Equus caballus*; Gg, *Gallus gallus*; Hs, *Homo sapiens*; Md, *Monodelphis domestica*; Oa, *Ornithorhynchus anatinus*; Pa, *Pongo pygmaeus abelii*; Rn, *Rattus norvegicus*; Xt, *Xenopus tropicalis*.

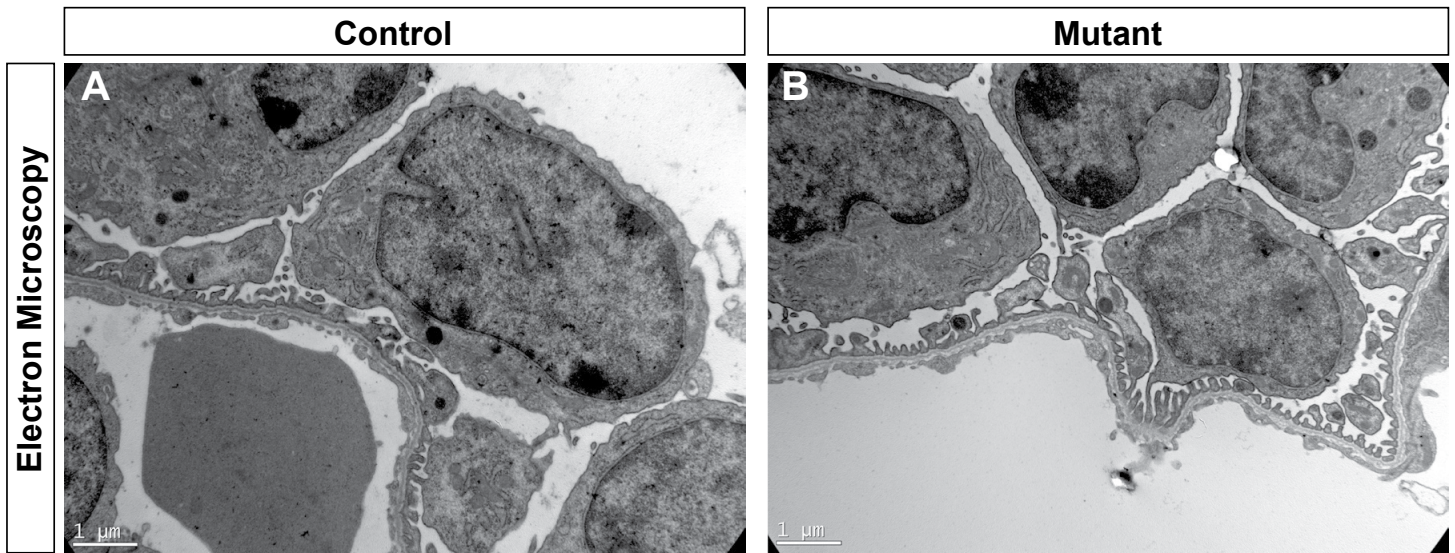

**Fig. S4. Podocytes develop normally in the absence of HNF1 $\beta$ .** Transmission electron microscopy of glomerular sections showing similar extent of foot process differentiation in podocytes of control (A) and mutant (B) newborn pups.

**Table S1. Antibodies**

| Host species | Target protein                            | Source                | Dilution |
|--------------|-------------------------------------------|-----------------------|----------|
| Mouse        | WT1                                       | Dako (M356101)        | 1:100    |
| Rabbit       | Laminin                                   | Sigma (L9393)         | 1:200    |
| Rabbit       | HNF4 $\alpha$                             | FRH4 (homemade)       | 1:100    |
| Rabbit       | JAG1                                      | Santa Cruz (SC-8303)  | 1:200    |
| –            | <i>Lotus tetragonolobus</i> lectin (LTL)  | Vector (B-1325)       | 1:200    |
| –            | <i>Dolichos biflorus</i> agglutinin (DBA) | Vector (B-1035)       | 1:200    |
| Mouse        | HNF1 $\beta$                              | HNF1b-3-12 (homemade) | 1:100    |

**Table S2. qRT-PCR primers**

| Gene           | Primer  | Sequence               |
|----------------|---------|------------------------|
| <i>Vil1</i>    | Reverse | GCGAGACTTCCGGAGCTACT   |
|                | Forward | CCCCTTCCGGATCACAAG     |
| <i>Hnf4a</i>   | Reverse | ATCACCTGGCAGATGATCGAA  |
|                | Forward | AGGTGTCAATCTTGCCATG    |
| <i>Slc12a1</i> | Reverse | CTGGCCTCATATGCGCTTATT  |
|                | Forward | AGATTTGGCATAACGAGGCATG |
| <i>Slc12a3</i> | Reverse | GGCCTACGAACACTATGCTAAC |
|                | Forward | AGTCAGCTCACGACCTTGC    |
| <i>Pvalb</i>   | Reverse | CAGACTCCTTCGACCACAAAAA |
|                | Forward | AACCCCAATCTTGCCGTCC    |
| <i>Dll1</i>    | Reverse | GAACAACCTAGCCAATTGCCA  |
|                | Forward | GCCCAATGATGCTAACAGAA   |
| <i>Jag1</i>    | Reverse | ACTCGGAAGTGGAGGAGGATG  |
|                | Forward | AGCGGACTTTCTGCTGGTGT   |
| <i>Jag2</i>    | Reverse | CAATGCTGAGCCTGACCAATAC |
|                | Forward | GACGGACAGTGGCATTCAA    |
| <i>Notch2</i>  | Reverse | CCCTGATCATCGTGGTGCT    |
|                | Forward | AATGCGCAAGTTGGTGTGG    |
| <i>Hes5</i>    | Reverse | TCAACAGCAGCATAGAGCAGC  |
|                | Forward | TCCAGGATGTCGGCCTTCT    |
| <i>Hey1</i>    | Reverse | CCGACGAGACCGAATCAATAAC |
|                | Forward | TCAGGTGATCCACAGTCATCTG |
| <i>Cdh6</i>    | Reverse | CTAGTGGCTTCCCAGCAAAG   |
|                | Forward | CTGATAATCGGATCCCGTGT   |
| <i>Pou3f3</i>  | Reverse | CAGCCTACAGCTGGAAAAGG   |

|              |         |                       |
|--------------|---------|-----------------------|
|              | Forward | GGTACCCACCTGCGAGTAGA  |
| <i>Hnf1a</i> | Reverse | AACCACCCTCTCTCCCAGTAA |
|              | Forward | GCCGCAGACACTGTGACTAA  |
| <i>Osr2</i>  | Reverse | CCACGGACTGTACACCTGTC  |
|              | Forward | GAAAGATCGCATGTTTCAGCA |
| <i>Irx1</i>  | Reverse | ATTCACGAGAGGACCCACAC  |
|              | Forward | TCCTTTCCCACACTCCTGAC  |
| <i>Pax2</i>  | Reverse | CAAAGTTCAGCAGCCTTTCC  |
|              | Forward | GTTAGAGGCGCTGGAAACAG  |
| <i>Lhx1</i>  | Reverse | TGCGTCCAGTGCTGTGAAT   |
|              | Forward | AACCAGATCGCTTGGAGAGAT |
| <i>Wt1</i>   | Reverse | GGTTTTCTCGCTCAGACCAG  |
|              | Forward | GGTGTGGGTCTTCAGATGGT  |
| <i>Wnt9b</i> | Reverse | GTGAGGTCCTGACACCCTTC  |
|              | Forward | GCCTGGACAGCTTCAGTAGG  |

**Table S3. ISH probe primers**

| Gene           | Primer  | Sequence               |
|----------------|---------|------------------------|
| <i>Osr2</i>    | Reverse | GCTGCAGCTCACCAATTACTCC |
|                | Forward | ACTTTGCCGCACTGCTCGCAGC |
| <i>Irx1</i>    | Reverse | ACCCTCACACAGGTCTCCAC   |
|                | Forward | GGAAAGATCGCATGTTTCAGCA |
| <i>Dll1</i>    | Reverse | CTAGAACAACCTCTGGGAGCGG |
|                | Forward | GTCTTCAAAGACCCAGGGATG  |
| <i>Lhx1</i>    | Reverse | ACAAATGGTTCCCGTAGCTG   |
|                | Forward | CAACATGCGTGTTATCCAGG   |
| <i>Pvalb</i>   | Reverse | CTGGAGAACCTGTTTCGCTTC  |
|                | Forward | CAGAGGCATCTCTACCACA    |
| <i>Slc12a1</i> | Reverse | CTGGTATGGTGAAGGCAGGT   |
|                | Forward | CAAACCAAAGCAAGCCATT    |

**Table S4. ChIP primers**

| Gene        | Sites                                                         | Primer  | Sequence             |
|-------------|---------------------------------------------------------------|---------|----------------------|
| <i>Dll1</i> | 17_15515811_HsRnCdRtXtBtMdEcPa_3.6<br>chr17:15515812-15515826 | Reverse | AGGGTCTGAGCTATGCTTGC |
|             |                                                               | Forward | GCTGTGTCCAACAGGGACTT |
|             | 17_15212029_HsGgRnBtMdEcPa_8.0<br>chr17:15212030-15212044     | Reverse | AAGAGCGGCCTCAGTCATTA |
|             |                                                               | Forward | CAGACCATAGCCACAGGACA |
| <i>Irx1</i> | 13_72166227_HsRnCdRtXtBtOaMdAcEcPa_4.5                        | Reverse | ACTCATGCCTGCGATAATCC |

|             |                                      |         |                      |
|-------------|--------------------------------------|---------|----------------------|
|             | chr13:72166228-72166242              | Forward | TTCCCACCAACCTCATTTTC |
|             | 13_72166816_HsRnCfXtBtOaMdAcEcPa_5.2 | Reverse | CGGCTGCTAATCCAGTGTCT |
|             | chr13:72166817-72166831              | Forward | GGGAGGACTTTCTCCTGTCC |
|             | 13_72115153_HsRnCfBtOaMdPa_3.4       | Reverse | ATGATGGTTCCAGGCTGTTC |
|             | chr13:72115154-72115168              | Forward | TGTGTGGATTGCTCATGGAT |
|             | 13_72098469_HsRnCfBtEcPa_4.8         | Reverse | TCCAGGGCACTCTTCAGTCT |
|             | chr13:72098470-72098484              | Forward | ACCTGTCACCGCTACAGACC |
| <i>Osr2</i> | 15_35201729_HsRnCfBtPa_5.8           | Reverse | ATGCTGGCCTTTTATGTTGC |
|             | chr15:35201730-35201744              | Forward | TGTGGGAAAATCAGACAGCA |
